# Supplementary material for: Hypermethylated Colorectal Cancer Patients Present a Myc-Driven Hypermetabolism with a One-Carbon Signature Associated to Worsen Prognosis
Source: Preprints.org preprint supplement (doi:10.20944/preprints202402.0487.v1), 2024-02-08
Supplement: Supplementary file 1 [file supplementary]

## Sheet: all
Gene/product	Gene/product name	GO class (direct)	Contributor	Organism	Evidence	Evidence with	PANTHER family	Reference	Date
FPGS	Folylpolyglutamate synthase, mitochondrial	one-carbon metabolic process	UniProt	Homo sapiens	IEA	UniProtKB-KW:KW-0554	folylpolyglutamate synthase-related pthr11136	GO_REF:0000043	20211010
CA7	Carbonic anhydrase 7	one-carbon metabolic process	GO_Central	Homo sapiens	IBA	PANTHER:PTN001825752 FB:FBgn0027844 FB:FBgn0027843	carbonic anhydrase pthr18952	PMID:21873635	20211111
CA6	Carbonic anhydrase 6	one-carbon metabolic process	GO_Central	Homo sapiens	IBA	PANTHER:PTN001825752 FB:FBgn0027844 FB:FBgn0027843	carbonic anhydrase pthr18952	PMID:21873635	20211111
CA13	Carbonic anhydrase 13	one-carbon metabolic process	GO_Central	Homo sapiens	IBA	PANTHER:PTN001825752 FB:FBgn0027844 FB:FBgn0027843	carbonic anhydrase pthr18952	PMID:21873635	20211111
MTHFD1	C-1-tetrahydrofolate synthase, cytoplasmic	one-carbon metabolic process	BHF-UCL	Homo sapiens	IMP		c-1-tetrahydrofolate synthase, cytoplasmic-related pthr48099	PMID:25633902	20150325
MTHFD1	C-1-tetrahydrofolate synthase, cytoplasmic	tetrahydrofolate interconversion	BHF-UCL	Homo sapiens	ISS	UniProtKB:Q922D8	c-1-tetrahydrofolate synthase, cytoplasmic-related pthr48099	GO_REF:0000024	20150324
MTHFD1	C-1-tetrahydrofolate synthase, cytoplasmic	tetrahydrofolate interconversion	UniProt	Homo sapiens	IEA	UniPathway:UPA00193	c-1-tetrahydrofolate synthase, cytoplasmic-related pthr48099	GO_REF:0000041	20211009
MTHFD1	C-1-tetrahydrofolate synthase, cytoplasmic	tetrahydrofolate interconversion	UniProt	Homo sapiens	IDA		c-1-tetrahydrofolate synthase, cytoplasmic-related pthr48099	PMID:10828945	20211027
MTHFD1	C-1-tetrahydrofolate synthase, cytoplasmic	tetrahydrofolate interconversion	BHF-UCL	Homo sapiens	IDA		c-1-tetrahydrofolate synthase, cytoplasmic-related pthr48099	PMID:1881876	20180612
MTHFD1	C-1-tetrahydrofolate synthase, cytoplasmic	tetrahydrofolate interconversion	GO_Central	Homo sapiens	IBA	PANTHER:PTN000002250 MGI:MGI:1342005 more...	c-1-tetrahydrofolate synthase, cytoplasmic-related pthr48099	PMID:21873635	20200810
MAT1A	S-adenosylmethionine synthase isoform type-1	one-carbon metabolic process	UniProt	Homo sapiens	IEA	UniProtKB-KW:KW-0554	s-adenosylmethionine synthetase pthr11964	GO_REF:0000043	20211010
CA4	Carbonic anhydrase 4	one-carbon metabolic process	GO_Central	Homo sapiens	IBA	PANTHER:PTN001825752 FB:FBgn0027844 FB:FBgn0027843	carbonic anhydrase pthr18952	PMID:21873635	20211111
SHMT2	Serine hydroxymethyltransferase, mitochondrial	one-carbon metabolic process	UniProt	Homo sapiens	IDA		serine hydroxymethyltransferase pthr11680	PMID:11516159	20080121
SHMT2	Serine hydroxymethyltransferase, mitochondrial	one-carbon metabolic process	UniProt	Homo sapiens	IDA		serine hydroxymethyltransferase pthr11680	PMID:29180469	20180319
SHMT2	Serine hydroxymethyltransferase, mitochondrial	one-carbon metabolic process	UniProt	Homo sapiens	IDA		serine hydroxymethyltransferase pthr11680	PMID:29364879	20180319
SHMT2	Serine hydroxymethyltransferase, mitochondrial	one-carbon metabolic process	UniProt	Homo sapiens	IDA		serine hydroxymethyltransferase pthr11680	PMID:29452640	20180319
SHMT2	Serine hydroxymethyltransferase, mitochondrial	one-carbon metabolic process	UniProt	Homo sapiens	IMP		serine hydroxymethyltransferase pthr11680	PMID:33015733	20210622
SHMT2	Serine hydroxymethyltransferase, mitochondrial	tetrahydrofolate interconversion	UniProt	Homo sapiens	IEA	UniPathway:UPA00193	serine hydroxymethyltransferase pthr11680	GO_REF:0000041	20211009
SHMT2	Serine hydroxymethyltransferase, mitochondrial	one-carbon metabolic process	GO_Central	Homo sapiens	IBA	PANTHER:PTN000188065 UniProtKB:Q8I566 more...	serine hydroxymethyltransferase pthr11680	PMID:21873635	20210904
SHMT2	Serine hydroxymethyltransferase, mitochondrial	tetrahydrofolate interconversion	GO_Central	Homo sapiens	IBA	PANTHER:PTN000913301 UniProtKB:P34896 more...	serine hydroxymethyltransferase pthr11680	PMID:21873635	20210904
AHCYL1	S-adenosylhomocysteine hydrolase-like protein 1	one-carbon metabolic process	UniProt	Homo sapiens	IEA	UniProtKB-KW:KW-0554	adenosylhomocysteinase pthr23420	GO_REF:0000043	20211010
AHCYL2	Adenosylhomocysteinase 3	one-carbon metabolic process	UniProt	Homo sapiens	IEA	UniProtKB-KW:KW-0554	adenosylhomocysteinase pthr23420	GO_REF:0000043	20211010
CA10	Carbonic anhydrase-related protein 10	one-carbon metabolic process	GO_Central	Homo sapiens	IBA	PANTHER:PTN001825752 FB:FBgn0027844 FB:FBgn0027843	carbonic anhydrase pthr18952	PMID:21873635	20211111
MTHFS	5-formyltetrahydrofolate cyclo-ligase	tetrahydrofolate interconversion	BHF-UCL	Homo sapiens	IMP		atpase inhibitor/5-formyltetrahydrofolate cyclo-ligase pthr23407	PMID:12764149	20150717
MTHFS	5-formyltetrahydrofolate cyclo-ligase	tetrahydrofolate interconversion	GO_Central	Homo sapiens	IBA	PANTHER:PTN000601268 UniProtKB:P49914	atpase inhibitor/5-formyltetrahydrofolate cyclo-ligase pthr23407	PMID:21873635	20170228
CA9	Carbonic anhydrase 9	one-carbon metabolic process	GO_Central	Homo sapiens	IBA	PANTHER:PTN001825752 FB:FBgn0027844 FB:FBgn0027843	carbonic anhydrase pthr18952	PMID:21873635	20211111
MTHFD2L	Probable bifunctional methylenetetrahydrofolate dehydrogenase/cyclohydrolase 2	tetrahydrofolate interconversion	UniProt	Homo sapiens	ISS	UniProtKB:D3ZUA0-1	c-1-tetrahydrofolate synthase, cytoplasmic-related pthr48099	GO_REF:0000024	20211029
MTHFD2L	Probable bifunctional methylenetetrahydrofolate dehydrogenase/cyclohydrolase 2	tetrahydrofolate interconversion	UniProt	Homo sapiens	IEA	UniPathway:UPA00193	c-1-tetrahydrofolate synthase, cytoplasmic-related pthr48099	GO_REF:0000041	20211009
MTHFD2L	Probable bifunctional methylenetetrahydrofolate dehydrogenase/cyclohydrolase 2	tetrahydrofolate interconversion	GO_Central	Homo sapiens	IBA	PANTHER:PTN000002250 MGI:MGI:1342005 more...	c-1-tetrahydrofolate synthase, cytoplasmic-related pthr48099	PMID:21873635	20200810
ALDH1L1	Cytosolic 10-formyltetrahydrofolate dehydrogenase	one-carbon metabolic process	UniProt	Homo sapiens	IEA	UniProtKB-KW:KW-0554	aldehyde dehydrogenase-related pthr11699	GO_REF:0000043	20211010
MTHFR	Methylenetetrahydrofolate reductase	tetrahydrofolate interconversion	UniProt	Homo sapiens	IEA	UniPathway:UPA00193	methylenetetrahydrofolate reductase pthr45754	GO_REF:0000041	20211009
MTHFR	Methylenetetrahydrofolate reductase	tetrahydrofolate interconversion	BHF-UCL	Homo sapiens	IGI	UniProtKB:P53128	methylenetetrahydrofolate reductase pthr45754	PMID:10551815	20200615
MTHFR	Methylenetetrahydrofolate reductase	tetrahydrofolate interconversion	BHF-UCL	Homo sapiens	IDA		methylenetetrahydrofolate reductase pthr45754	PMID:12673793	20200615
MTHFR	Methylenetetrahydrofolate reductase	tetrahydrofolate interconversion	BHF-UCL	Homo sapiens	IMP		methylenetetrahydrofolate reductase pthr45754	PMID:12673793	20200615
MTHFR	Methylenetetrahydrofolate reductase	tetrahydrofolate interconversion	UniProt	Homo sapiens	IMP		methylenetetrahydrofolate reductase pthr45754	PMID:25736335	20150923
MTHFR	Methylenetetrahydrofolate reductase	tetrahydrofolate interconversion	UniProt	Homo sapiens	IDA		methylenetetrahydrofolate reductase pthr45754	PMID:29891918	20211029
MTHFR	Methylenetetrahydrofolate reductase	tetrahydrofolate interconversion	GO_Central	Homo sapiens	IBA	PANTHER:PTN000472667 UniProtKB:P42898	methylenetetrahydrofolate reductase pthr45754	PMID:21873635	20180419
CA2	Carbonic anhydrase 2	one-carbon metabolic process	GO_Central	Homo sapiens	IBA	PANTHER:PTN001825752 FB:FBgn0027844 FB:FBgn0027843	carbonic anhydrase pthr18952	PMID:21873635	20211111
CA1	Carbonic anhydrase 1	one-carbon metabolic process	GO_Central	Homo sapiens	IBA	PANTHER:PTN001825752 FB:FBgn0027844 FB:FBgn0027843	carbonic anhydrase pthr18952	PMID:21873635	20211111
ALDH1L2	Mitochondrial 10-formyltetrahydrofolate dehydrogenase	one-carbon metabolic process	UniProt	Homo sapiens	IEA	UniProtKB-KW:KW-0554	aldehyde dehydrogenase-related pthr11699	GO_REF:0000043	20211010
TYMS	Thymidylate synthase	tetrahydrofolate interconversion	BHF-UCL	Homo sapiens	IDA		thymidylate synthase 1 pthr11548	PMID:15093541	20150730
MAT2A	S-adenosylmethionine synthase isoform type-2	one-carbon metabolic process	UniProt	Homo sapiens	IEA	UniProtKB-KW:KW-0554	s-adenosylmethionine synthetase pthr11964	GO_REF:0000043	20211010
DHFR2	Dihydrofolate reductase 2, mitochondrial	one-carbon metabolic process	UniProt	Homo sapiens	IEA	UniProtKB-KW:KW-0554	dihydrofolate reductase pthr48069	GO_REF:0000043	20211010
SFXN1	Sideroflexin-1	one-carbon metabolic process	UniProt	Homo sapiens	IDA		sideroflexin pthr11153	PMID:30442778	20190107
AHCY	Adenosylhomocysteinase	one-carbon metabolic process	UniProt	Homo sapiens	IEA	UniProtKB-KW:KW-0554	adenosylhomocysteinase pthr23420	GO_REF:0000043	20211010
MTHFD2	Bifunctional methylenetetrahydrofolate dehydrogenase/cyclohydrolase, mitochondrial	tetrahydrofolate interconversion	GO_Central	Homo sapiens	IBA	PANTHER:PTN000002250 MGI:MGI:1342005 more...	c-1-tetrahydrofolate synthase, cytoplasmic-related pthr48099	PMID:21873635	20200810
CA8	Carbonic anhydrase-related protein	one-carbon metabolic process	GO_Central	Homo sapiens	IBA	PANTHER:PTN001825752 FB:FBgn0027844 FB:FBgn0027843	carbonic anhydrase pthr18952	PMID:21873635	20211111
CA5A	Carbonic anhydrase 5A, mitochondrial	one-carbon metabolic process	GO_Central	Homo sapiens	IBA	PANTHER:PTN001825752 FB:FBgn0027844 FB:FBgn0027843	carbonic anhydrase pthr18952	PMID:21873635	20211111
MAT2B	Methionine adenosyltransferase 2 subunit beta	one-carbon metabolic process	UniProt	Homo sapiens	IEA	UniProtKB-KW:KW-0554	dtdp-4-dehydrorhamnose reductase pthr10491	GO_REF:0000043	20211010
SFXN3	Sideroflexin-3	one-carbon metabolic process	UniProt	Homo sapiens	IDA		sideroflexin pthr11153	PMID:30442778	20190107
SHMT1	Serine hydroxymethyltransferase, cytosolic	tetrahydrofolate interconversion	UniProt	Homo sapiens	IEA	UniPathway:UPA00193	serine hydroxymethyltransferase pthr11680	GO_REF:0000041	20211009
SHMT1	Serine hydroxymethyltransferase, cytosolic	tetrahydrofolate interconversion	BHF-UCL	Homo sapiens	IDA		serine hydroxymethyltransferase pthr11680	PMID:24698160	20150715
SHMT1	Serine hydroxymethyltransferase, cytosolic	one-carbon metabolic process	GO_Central	Homo sapiens	IBA	PANTHER:PTN000188065 UniProtKB:Q8I566 more...	serine hydroxymethyltransferase pthr11680	PMID:21873635	20210904
SHMT1	Serine hydroxymethyltransferase, cytosolic	tetrahydrofolate interconversion	GO_Central	Homo sapiens	IBA	PANTHER:PTN000913301 UniProtKB:P34896 more...	serine hydroxymethyltransferase pthr11680	PMID:21873635	20210904
CA14	Carbonic anhydrase 14	one-carbon metabolic process	GO_Central	Homo sapiens	IBA	PANTHER:PTN001825752 FB:FBgn0027844 FB:FBgn0027843	carbonic anhydrase pthr18952	PMID:21873635	20211111
MTHFD1L	Monofunctional C1-tetrahydrofolate synthase, mitochondrial	tetrahydrofolate interconversion	UniProt	Homo sapiens	IEA	UniPathway:UPA00193	c-1-tetrahydrofolate synthase, cytoplasmic-related pthr48099	GO_REF:0000041	20211009
MTHFD1L	Monofunctional C1-tetrahydrofolate synthase, mitochondrial	tetrahydrofolate interconversion	GO_Central	Homo sapiens	IBA	PANTHER:PTN000002250 MGI:MGI:1342005 more...	c-1-tetrahydrofolate synthase, cytoplasmic-related pthr48099	PMID:21873635	20200810
CA11	Carbonic anhydrase-related protein 11	one-carbon metabolic process	GO_Central	Homo sapiens	IBA	PANTHER:PTN001825752 FB:FBgn0027844 FB:FBgn0027843	carbonic anhydrase pthr18952	PMID:21873635	20211111
FTCD	Formimidoyltransferase-cyclodeaminase	tetrahydrofolate interconversion	UniProt	Homo sapiens	IEA	UniPathway:UPA00193	formiminotransferase-cyclodeaminase pthr12234	GO_REF:0000041	20211009
CA3	Carbonic anhydrase 3	one-carbon metabolic process	GO_Central	Homo sapiens	IBA	PANTHER:PTN001825752 FB:FBgn0027844 FB:FBgn0027843	carbonic anhydrase pthr18952	PMID:21873635	20211111
GNMT	Glycine N-methyltransferase	one-carbon metabolic process	GO_Central	Homo sapiens	IBA	PANTHER:PTN001046627 MGI:MGI:1202304	glycine n-methyltransferase pthr16458	PMID:21873635	20180916
DHFR	Dihydrofolate reductase	one-carbon metabolic process	UniProt	Homo sapiens	IEA	UniProtKB-KW:KW-0554	dihydrofolate reductase pthr48069	GO_REF:0000043	20211010
CA12	Carbonic anhydrase 12	one-carbon metabolic process	GO_Central	Homo sapiens	IBA	PANTHER:PTN001825752 FB:FBgn0027844 FB:FBgn0027843	carbonic anhydrase pthr18952	PMID:21873635	20211111
CA5B	Carbonic anhydrase 5B, mitochondrial	one-carbon metabolic process	GO_Central	Homo sapiens	IBA	PANTHER:PTN001825752 FB:FBgn0027844 FB:FBgn0027843	carbonic anhydrase pthr18952	PMID:21873635	20211111
